# Supplementary material for: Working conditions and Work-Family Conflict in German hospital physicians: psychosocial and organisational predictors and consequences
Source: PubMed Central journal article supplement (PMC2577658; doi:10.1186/1471-2458-8-353), 2008-10-07
Supplement: 1471-2458-8-353-S1.pdf [file 1471-2458-8-353-S1.pdf]

Table 1: Parameters assessed by the German COPSOQ version [6,7,47] in our study, reliability information, sample items, and their response scales

| COPSOQ scale                                             | Cronbach's alpha | sample item ( <i>response scale</i> )                                                                                                                                                                                                                                               |
|----------------------------------------------------------|------------------|-------------------------------------------------------------------------------------------------------------------------------------------------------------------------------------------------------------------------------------------------------------------------------------|
| <b>demands at work</b>                                   |                  |                                                                                                                                                                                                                                                                                     |
| quantitative demands                                     | .73              | Is your workload unevenly distributed so it piles up?<br>( <i>always, often, sometimes, seldom, never/hardly never</i> )                                                                                                                                                            |
| cognitive demands                                        | .69              | Does your work require that you remember a lot of things?<br>( <i>always, often, sometimes, seldom, never/hardly never</i> )                                                                                                                                                        |
| emotional demands                                        | .72              | Does your work put you in emotionally disturbing situations?<br>( <i>always, often, sometimes, seldom, never/hardly never</i> )                                                                                                                                                     |
| demands for hiding emotions                              | .73              | Does your work require that you do not state your opinion?<br>( <i>always, often, sometimes, seldom, never/hardly never</i> )                                                                                                                                                       |
| <b>control or influence/development at work</b>          |                  |                                                                                                                                                                                                                                                                                     |
| influence at work                                        | .79              | Do you have a say in choosing who you work with?<br>( <i>always, often, sometimes, seldom, never/hardly never</i> )                                                                                                                                                                 |
| possibilities for development                            | .77              | Can you use your skills or expertise in your work?<br>( <i>to a very large extent, to a large extent, somewhat, to a small extent, to a very small extent</i> )                                                                                                                     |
| workplace commitment                                     | .69              | Do you enjoy telling others about your place of work?<br>( <i>to a very large extent, to a large extent, somewhat, to a small extent, to a very small extent</i> )                                                                                                                  |
| <b>support or interpersonal relations and leadership</b> |                  |                                                                                                                                                                                                                                                                                     |
| role clarity                                             | .84              | Do you know exactly which areas are your responsibility?<br>( <i>to a very large extent, to a large extent, somewhat, to a small extent, to a very small extent</i> )                                                                                                               |
| role conflict                                            | .73              | Are contradictory demands placed on you at work?<br>( <i>to a very large extent, to a large extent, somewhat, to a small extent, to a very small extent</i> )                                                                                                                       |
| quality of leadership                                    | .85              | To what extent would you say that your immediate superior is good at work planning?<br>( <i>to a very large extent, to a large extent, somewhat, to a small extent, to a very small extent</i> )                                                                                    |
| sense of community                                       | .80              | Is there a good atmosphere between you and your colleagues?<br>( <i>always, often, sometimes, seldom, never/hardly never</i> )                                                                                                                                                      |
| <b>outcome scales</b>                                    |                  |                                                                                                                                                                                                                                                                                     |
| behavioural stress symptoms                              | .86              | Please consider each of the following statements and indicate how well the descriptions fit your situation during the past 4 weeks! I have not been able to stand dealing with other people. ( <i>correct, almost correct, somewhat correct, only slightly correct, incorrect</i> ) |
| cognitive stress symptoms                                | .86              | How much of the time during the past 4 weeks have you found it difficult to think clearly?<br>( <i>always, often, sometimes, seldom, never/hardly never</i> )                                                                                                                       |
| relational justice [93–95]                               | .88              | Your supervisor considers your viewpoint.<br>( <i>I strongly agree, I rather agree, I don't know, I rather disagree, I strongly disagree</i> )                                                                                                                                      |
| intention to leave profession [96]                       | single item      |                                                                                                                                                                                                                                                                                     |
| job satisfaction                                         | .71              | Regarding your work in general. How pleased are you with the way your abilities are used?<br>( <i>very satisfied, satisfied, unsatisfied, highly unsatisfied, not relevant</i> )                                                                                                    |
| work ability [97,98]                                     | index            | How do you rate your current work ability with respect to the physical demands of your work? ( <i>very poor – very good, 5 point Likert scale</i> )                                                                                                                                 |
| general health status [99]                               | single item      |                                                                                                                                                                                                                                                                                     |
| personal burnout [100]                                   | .90              | How often do you feel tired? ( <i>always, often, sometimes, seldom, never/hardly never</i> )                                                                                                                                                                                        |
| satisfaction with life scale [101]                       | .87              | I'm satisfied with my life. ( <i>I strongly agree – I strongly disagree, 7 point Likert scale</i> )                                                                                                                                                                                 |
