# Supplementary material for: Working conditions and Work-Family Conflict in German hospital physicians: psychosocial and organisational predictors and consequences
Source: PubMed Central journal article supplement (PMC2577658; doi:10.1186/1471-2458-8-353), 2008-10-07
Supplement: 1471-2458-8-353-S2.pdf [file 1471-2458-8-353-S2.pdf]

Table 4: Psychosocial working conditions and outcome factors in the physicians' sample and the general population (2003) [6,7,47] assessed by the German COPSOQ version

| COPSOQ working conditions         | general German population, COPSOQ 2003/2004 |      |      | hospital physicians 2005 |     |      | F       | p    | eta  | eta <sup>2</sup> |
|-----------------------------------|---------------------------------------------|------|------|--------------------------|-----|------|---------|------|------|------------------|
|                                   | mean                                        | n =  | sd   | mean                     | n = | sd   |         |      |      |                  |
| work-family-conflict              | 44.8                                        | 2541 | 28.4 | 74.2                     | 295 | 24.5 | 292.203 | .000 | .306 | .093             |
| quantitative demands              | 56.7                                        | 2538 | 17.2 | 72.6                     | 296 | 14.8 | 233.137 | .000 | .276 | .076             |
| influence at work                 | 46.6                                        | 2541 | 17.9 | 37.8                     | 295 | 19.3 | 62.760  | .000 | .147 | .022             |
| quality of leadership             | 51.1                                        | 2477 | 23.9 | 43.5                     | 291 | 20.6 | 27.330  | .000 | .099 | .010             |
| role conflict                     | 46.5                                        | 2539 | 19.7 | 51.0                     | 296 | 16.3 | 14.180  | .000 | .071 | .005             |
| commitment to workplace           | 53.7                                        | 2539 | 19.3 | 56.6                     | 296 | 16.1 | 6.218   | .013 | .047 | .002             |
| role clarity                      | 76.9                                        | 2542 | 15.8 | 78.5                     | 295 | 15.1 | 3.050   | .081 | .033 | .001             |
| relational justice                | 65.0                                        | 2476 | 23.1 | 62.7                     | 291 | 23.8 | 2.477   | .116 | .030 | .001             |
| possibilities for development     | 70.3                                        | 2541 | 16.4 | 71.8                     | 296 | 15.6 | 2.268   | .132 | .028 | .001             |
| demands for hiding emotions       | 52.1                                        | 2544 | 21.2 | 50.4                     | 296 | 19.0 | 1.587   | .208 | .024 | .001             |
| sense of community                | 75.5                                        | 2514 | 16.9 | 74.3                     | 296 | 15.9 | 1.461   | .227 | .023 | .001             |
| emotional demands                 | 62.6                                        | 2537 | 20.7 | 64.2                     | 295 | 16.3 | 1.456   | .228 | .023 | .001             |
| cognitive demands                 | 74.3                                        | 2543 | 16.0 | 75.4                     | 296 | 13.3 | 1.246   | .264 | .021 | .000             |
| <b>outcomes</b>                   |                                             |      |      |                          |     |      |         |      |      |                  |
| behavioural stress symptoms       | 31.1                                        | 2232 | 22.2 | 42.9                     | 295 | 21.1 | 74.348  | .000 | .169 | .029             |
| general health status             | 71.8                                        | 2427 | 18.1 | 80.1                     | 295 | 14.4 | 58.176  | .000 | .145 | .021             |
| work ability index                | 75.5                                        | 2363 | 15.1 | 80.1                     | 286 | 12.1 | 25.017  | .000 | .097 | .009             |
| job satisfaction                  | 59.8                                        | 2423 | 15.7 | 54.9                     | 296 | 17.6 | 24.632  | .000 | .095 | .009             |
| personal burnout                  | 42.2                                        | 2434 | 18.8 | 46.9                     | 296 | 18.4 | 16.974  | .000 | .079 | .006             |
| intention to leave the profession | 15.9                                        | 1948 | 22.3 | 18.7                     | 295 | 24.5 | 3.942   | .047 | .042 | .002             |
| satisfaction with life            | 64.3                                        | 2226 | 19.0 | 63.5                     | 296 | 20.2 | .405    | .525 | .013 | .000             |
| cognitive stress symptoms         | 29.4                                        | 2230 | 19.0 | 29.9                     | 296 | 17.9 | .188    | .665 | .009 | .000             |
